# Supplementary material for: ROCK 1 and 2 affect the spatial architecture of 3D spheroids derived from human corneal stromal fibroblasts in different manners
Source: PubMed Central journal article supplement (PMC9076620; doi:10.1038/s41598-022-11407-1), 2022-05-06
Supplement: 41598_2022_11407_MOESM1_ESM.pdf [file 41598_2022_11407_MOESM1_ESM.pdf]

ROCK1 and 2 affect the spatial architecture of 3D spheroids derived from human corneal stroma fibroblasts in different manners

Yosuke Ida<sup>1</sup>, Araya Umetsu<sup>1</sup>, Masato Furuhashi<sup>2</sup>, Megumi Watanabe<sup>1</sup>, Yuri Tsugeno<sup>1</sup>, Soma Suzuki<sup>1</sup>, Fumihito Hikage<sup>1</sup>, Hiroshi Ohguro<sup>1</sup>.

Departments of Ophthalmology<sup>1</sup> and Cardiovascular, Renal and Metabolic Medicine<sup>2</sup>, Sapporo Medical University School of Medicine

Short title: Study of ROCK inhibitors on HCSFs by 3D culture

Key words: 3D spheroid culture, Rho-associated kinase (ROCK), ROCK inhibitor, human corneal stroma fibroblasts (HCSFs)

All correspondence should be addressed to Hiroshi Ohguro

Tel# 81-11-611-2111, Fax# 81-11-613-6575, e-mail: [ooguro@sapmed.ac.jp](mailto:ooguro@sapmed.ac.jp)

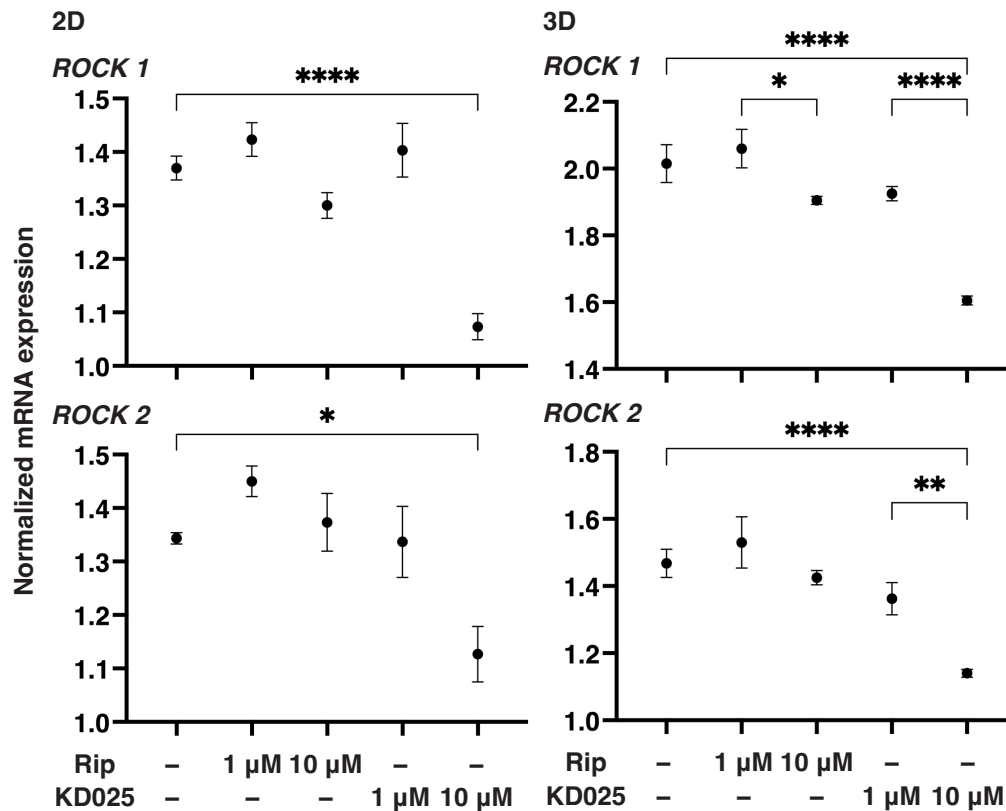

**Supplemental Figure 1. mRNA expression of ROCK 1 and ROCK 2 in 2D and 3D human corneal stroma fibroblasts (HCSFs).**

In the absence or presence of 1  $\mu$ M or 10  $\mu$ M ROCK-is, ripasudil (Rip) or KD025, 2D or 3D cultured HCSFs at Day 6 were subjected to qPCR analysis and the mRNA expression of ROCK 1 and ROCK 2 was estimated. All experiments were performed in duplicate using fresh preparations (2D; n=5, 3D; n=10-15, each). Data are presented as the arithmetic mean  $\pm$  standard error of the mean (SEM). \*  $P < 0.05$ , \*\*  $P < 0.01$ , \*\*\*\*  $P < 0.001$  (ANOVA followed by a Tukey's multiple comparison test).

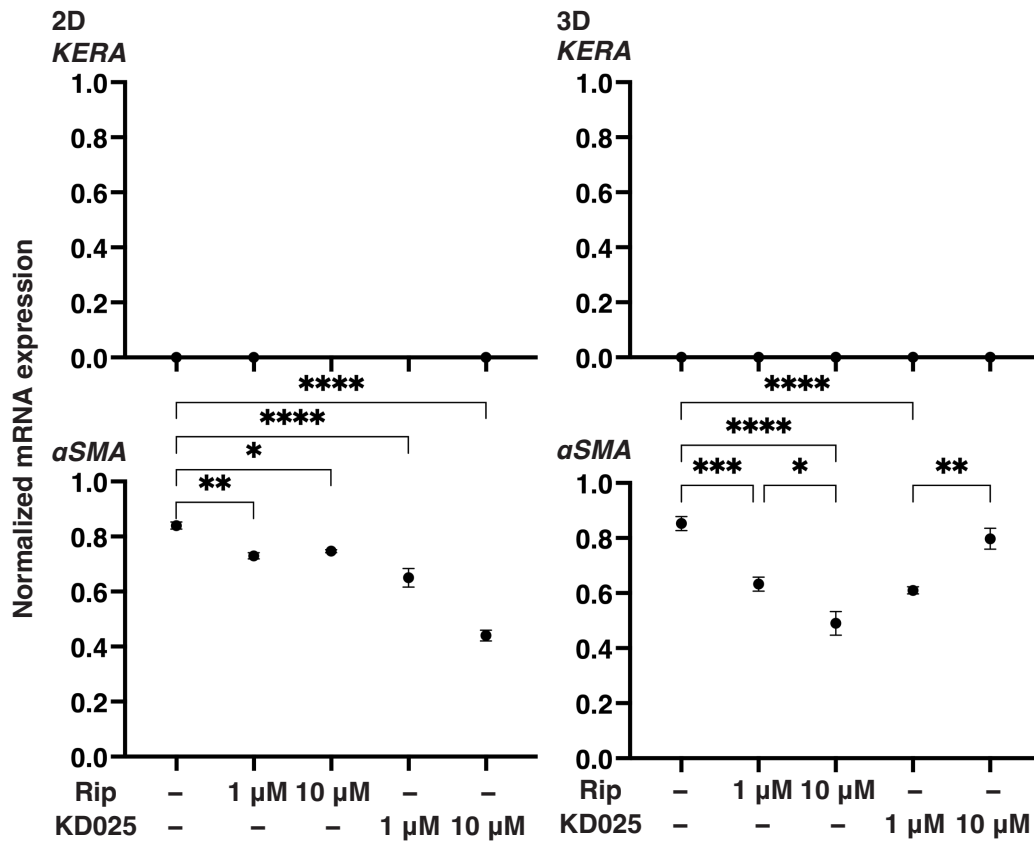

**Supplemental Figure 2. mRNA expression of keratocan and  $\alpha$ SMA in 2D and 3D human corneal stromal fibroblasts (HCSFs).**

In the absence or presence of 1  $\mu$ M or 10  $\mu$ M ROCK-is, ripasudil (Rip), or KD025, 2D or 3D cultured HCSFs 6 were subjected to qPCR analysis at Day 6, and the mRNA expression of keratocan and  $\alpha$ SMA estimated. All experiments were performed in duplicate using fresh preparations (2D; n=5, 3D; n=10-15, each). Data are presented as the arithmetic mean  $\pm$  standard error of the mean (SEM). \*  $P < 0.05$ , \*\*  $P < 0.01$ , \*\*\*  $P < 0.005$ , \*\*\*\*  $P < 0.001$  (ANOVA followed by a Tukey's multiple comparison test).

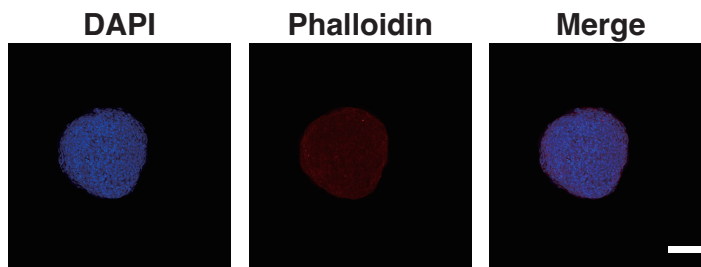

**Supplemental Figure 3. Representative confocal images showing the DAPI and phalloidin in 3D human corneal stromal fibroblast (HCSFs) spheroids.**

At Day 6, 3D cultures of spheroids of HCSFs were immune-stained with specific antibodies of DAPI by blue and phalloidin by red. Scale bar: 100  $\mu$  m.
