# Supplementary material for: ROCK 1 and 2 affect the spatial architecture of 3D spheroids derived from human corneal stromal fibroblasts in different manners
Source: PubMed Central journal article supplement (PMC9076620; doi:10.1038/s41598-022-11407-1), 2022-05-06
Supplement: 41598_2022_11407_MOESM2_ESM.pdf [file 41598_2022_11407_MOESM2_ESM.pdf]

ROCK1 and 2 affect the spatial architecture of 3D spheroids derived from human corneal stroma fibroblasts in different manners

Yosuke Ida<sup>1</sup>, Araya Umetsu<sup>1</sup>, Masato Furuhashi<sup>2</sup>, Megumi Watanabe<sup>1</sup>, Yuri Tsugeno<sup>1</sup>, Soma Suzuki<sup>1</sup>, Fumihito Hikage<sup>1</sup>, Hiroshi Ohguro<sup>1</sup>.

Departments of Ophthalmology<sup>1</sup> and Cardiovascular, Renal and Metabolic Medicine<sup>2</sup>, Sapporo Medical University School of Medicine

Short title: Study of ROCK inhibitors on HCSFs by 3D culture

Key words: 3D spheroid culture, Rho-associated kinase (ROCK), ROCK inhibitor, human corneal stroma fibroblasts (HCSFs)

All correspondence should be addressed to Hiroshi Ohguro

Tel# 81-11-611-2111, Fax# 81-11-613-6575, e-mail: [ooguro@sapmed.ac.jp](mailto:ooguro@sapmed.ac.jp)

|                    |         | Sequence                                                | Exon Location | RefSeqNumber |
|--------------------|---------|---------------------------------------------------------|---------------|--------------|
| human RPLP0        | Probe   | 5'-/56-FAM/CCCTGTCTT/ZEN/CCCTGGGCATCAC/3IABkFQ/-3'      | 2-3           | NM_001002    |
|                    | Forward | 5'-TCGTCTTTAAACCCTGCGTG-3'                              |               |              |
|                    | Reverse | 5'-TGTCTGCTCCCACAATGAAAC-3'                             |               |              |
| human COL1A1       | Probe   | 5'-/56-FAM/TCGAGGGCC/ZEN/AAGACGAAGACATC/3IABkFQ/-3'     | 1-2           | NM_000088    |
|                    | Forward | 5'-GACATGTTACAGCTTTGTGGAC-3'                            |               |              |
|                    | Reverse | 5'-TTCTGTACGCAGGTGATTGG-3'                              |               |              |
| human COL4A1       | Probe   | 5'-/56-FAM/TCATACAGA/ZEN/CTTGCCAGCGGCT/3IABkFQ/-3'      | 51-52         | NM_001845    |
|                    | Forward | 5'-AGAGAGGAGCGAGATGTTC-3'                               |               |              |
|                    | Reverse | 5'-TGAGTCAGGCTTCATTATGTTCT-3'                           |               |              |
| human COL6A1       | Forward | 5'-CCTCGTGGACAAAGTCAAGT-3'                              | 2-3           | NM_001848    |
|                    | Reverse | 5'-GTGAGGCCTTGATGATCTC-3'                               |               |              |
| human FN1          | Forward | 5'-CGTCCTAAAGACTCCATGATCTG-3'                           | 3-4           | NM_212482    |
|                    | Reverse | 5'-ACCAATCTTGTAGGACTGACC-3'                             |               |              |
| human TIMP1        | Probe   | 5'-/56-FAM/TCAACCAGA/ZEN/CCACCTTATACCAGCG/3IABkFQ/-3'   | 2-4           | NM_003254    |
|                    | Forward | 5'-GCTTGGAAACCCTTATACATCTTG-3'                          |               |              |
|                    | Reverse | 5'-CCTTCTGCAATCCGACCT-3'                                |               |              |
| human TIMP2        | Probe   | 5'-/56-FAM/TCTCATTGC/ZEN/AGGAAAGGCCGAGG/3IABkFQ/-3'     | 3-4           | NM_003255    |
|                    | Forward | 5'-TGTGGTTCCAGGCTCTTTC-3'                               |               |              |
|                    | Reverse | 5'-GACGTTGGAGGAAGAAGGA-3'                               |               |              |
| human TIMP3        | Probe   | 5'-/56-FAM/CCTCCTTTA/ZEN/CCAGCTTCTCCCCAC/3IABkFQ/-3'    | 1-3           | NM_000362    |
|                    | Forward | 5'-CGGTACATCTTCATCTGCTTGA-3'                            |               |              |
|                    | Reverse | 5'-CCTTCTGCAACTCCGACATC-3'                              |               |              |
| human TIMP4        | Probe   | 5'-/56-FAM/ACTGAGGAC/ZEN/CTGACCAGTCAAGAGA/3IABkFQ/-3'   | 4-5           | NM_003256    |
|                    | Forward | 5'-GTTGCACAGATGGATGAAGAC-3'                             |               |              |
|                    | Reverse | 5'-GGTTTGAGAAAGTCAAGGATGTTC-3'                          |               |              |
| human MMP2         | Probe   | 5'-/56-FAM/TTCTGTCCC/ZEN/CATGAAGCCCTGTTCC/3IABkFQ/-3'   | 6-7           | NM_004530    |
|                    | Forward | 5'-GTGCAGCTGTCATAGGATGT-3'                              |               |              |
|                    | Reverse | 5'-TCCACCACCTACAACCTTGAG-3'                             |               |              |
| human MMP3         | Probe   | 5'-/56-FAM/TTCTGTCCC/ZEN/CATGAAGCCCTGTTCC/3IABkFQ/-3'   | 6-7           | NM_004530    |
|                    | Forward | 5'-GTGCAGCTGTCATAGGATGT-3'                              |               |              |
|                    | Reverse | 5'-TCCACCACCTACAACCTTGAG-3'                             |               |              |
| human MMP9         | Probe   | 5'-/56-FAM/CCAGGAGGA/ZEN/AAGGCGTGTGC/3IABkFQ/-3'        | 3-4           | NM_004994    |
|                    | Forward | 5'-CGTCGAAATGGGCGTCT-3'                                 |               |              |
|                    | Reverse | 5'-ACATCGTCATCCAGTTTGGTG-3'                             |               |              |
| human MMP14        | Probe   | 5'-/56-FAM/TTGTTCCCTC/ZEN/AAAGTGCCTGTTTGCTC/3IABkFQ/-3' | 1-1           | NM_004995    |
|                    | Forward | 5'-CTTGAATTCCTAGACCCTGTG-3'                             |               |              |
|                    | Reverse | 5'-TTCGCCGACTAAGCAGAAG-3'                               |               |              |
| human GRP78        | Forward | 5'-CATCACGCGTCCTATGTCG-3'                               |               | NM_005347    |
|                    | Reverse | 5'-CGTCAAAGACCGTGTCTCG-3'                               |               |              |
| human GRP94        | Forward | 5'-CTGGGACTGGAACTTATGAATG-3'                            |               | NM_003299    |
|                    | Reverse | 5'-TCCATATTCGTCAAACAGACCAC-3'                           |               |              |
| human IRE1         | Forward | 5'-TTTGGAAGTACCAGCACAGTG-3'                             |               | NM_001433    |
|                    | Reverse | 5'-TGCCATCATTAGGATCTGGGA-3'                             |               |              |
| human ATF6         | Forward | 5'-TCAGACAGTACCAACGCTTATGC-3'                           |               | NM_007348    |
|                    | Reverse | 5'-GTTGTACCACAGTAGGCTGAGA-3'                            |               |              |
| human PERK         | Forward | 5'-ACGATGAGACAGAGTTGCGAC-3'                             |               | NM_004836    |
|                    | Reverse | 5'-AATCCCACTGCTTTTACCATGA-3'                            |               |              |
| human ATF4         | Forward | 5'-ATGACCGAAATGAGCTTCCTG-3'                             |               | NM_0016752   |
|                    | Reverse | 5'-CTGGAGAACCATGAGGTTTG-3'                              |               |              |
| human XBP1         | Forward | 5'-AGTAGCAGCTCAGACTGCCA-3'                              |               | NM_005080    |
|                    | Reverse | 5'-CCTGGTTCTCAACTACAAGGC-3'                             |               |              |
| human sXBP1        | Forward | 5'-GGTCTGCTGAGTCCGCAGCAGG-3'                            |               | AB076384     |
|                    | Reverse | 5'-GGGCTTGGTATATATGTGG-3'                               |               |              |
| human CHOP         | Forward | 5'-GGAGAACCAGGAAACGAAAC-3'                              |               | NM_004083    |
|                    | Reverse | 5'-TCTCCTTCATGCGCTGCTTT-3'                              |               |              |
| human KERA         | Probe   | 5'-/56-FAM/TGTAATATG/ZEN/TCCCAGCCCATGC/3IABkFQ/-3'      | 2-3           | NM_007035    |
|                    | Forward | 5'-GTTCCCCAATCAGTGCTC-3'                                |               |              |
|                    | Reverse | 5'-TGAGGTCCATAACTGAAGGAATC-3'                           |               |              |
| human $\alpha$ SMA | Probe   | 5'-/56-FAM/AGACCCTGT/ZEN/TCCAGCCATCCTT/3IABkFQ/-3'      | 1-1           | NM_004995    |
|                    | Forward | 5'-CTGTTGAGGTGGTTTCATGGA-3'                             |               |              |
|                    | Reverse | 5'-AGAGTTACGAGTTGCCATGATG-3'                            |               |              |

**Supplemental Table 1 Primers for qPCR**
